# Supplementary material
Source: PubMed Central journal article supplement (PMC5509463)
Supplement: NIHMS869971-supplement.pdf [file NIHMS869971-supplement.pdf]

## Appendix A

Contaminants of emerging concern in a large temperate estuary.

James P. Meador<sup>1,2,\*</sup>, Andrew Yeh<sup>2</sup>, Graham Young<sup>3,4</sup>, and Evan P. Gallagher<sup>2</sup>

<sup>1</sup>Ecotoxicology and Environmental Fish Health Program, Northwest Fisheries Science Center, NOAA Fisheries, Seattle, Washington 98112.

<sup>2</sup>Department of Environmental and Occupational Health Sciences, University of Washington, Seattle, Washington.

<sup>3</sup>School of Aquatic and Fisheries Sciences, University of Washington, Seattle, Washington.

<sup>4</sup>Center for Reproductive Biology, Washington State University, Pullman, Washington.

Email: [james.meador@noaa.gov](mailto:james.meador@noaa.gov)

\*Corresponding author

Table S1. List of all analytes measured in this study and their matrix reporting limits.

Table S2. Half-life, pKa,  $K_{ow}$ , usage, and mechanism of action for all detected analytes.

Table S3. Analytes that were not detected in effluent, estuary water, or fish tissue.

Table S4. Observed and predicted bioconcentration factors and sediment partition coefficients and observed concentrations for all analytes detected in water.

Table S5. Concentrations of detected analytes in both fish and water samples for all replicates.

Table S1. List of all analytes measured in this study and their matrix reporting limits.

|    | Class | Analyte class          | Method water | Method tissue | Analyte                       | Abbrev          | Common name | Water RL (ng/L) | Tiss RL (ng/g) |
|----|-------|------------------------|--------------|---------------|-------------------------------|-----------------|-------------|-----------------|----------------|
| 1  | 1     | AP and APE             | MLA 004      | MLA 080       | 4-Nonylphenols                | 4-NP            |             | 9.1             | 0.46           |
| 2  | 1     |                        |              |               | 4-Nonylphenol diethoxylates   | NP2EO           |             | 14.8            | 0.46           |
| 3  | 1     |                        |              |               | 4-Nonylphenol monoethoxylates | NP1EO           |             | 18.6            | 0.46           |
| 4  | 1     |                        |              |               | Octylphenol                   | 4-OP            |             | 2.35            | 0.46           |
| 5  | 2     | BPA (specific method)  | MLA 082      | MLA 084       | Bisphenol A                   | BPA             |             | 1.92            | 1.01           |
| 6  | 3     | HBCDD flame retardants |              | MLA 070       | alpha-Hexabromocyclododecane  | $\alpha$ -HBCDD |             |                 | 0.10           |
| 7  | 3     |                        |              |               | beta-Hexabromocyclododecane   | $\beta$ -HBCDD  |             |                 | 0.10           |
| 8  | 3     |                        |              |               | gamma-Hexabromocyclododecane  | $\gamma$ -HBCDD |             |                 | 0.10           |
| 9  | 4     | Hormones (negative)    | MLA 072      |               | 17 alpha-Dihydroequilin       |                 |             | 4.33            |                |
| 10 | 4     |                        |              |               | 17 alpha-Estradiol            |                 |             | 4.33            |                |
| 11 | 4     |                        |              |               | 17 alpha-Ethinyl-Estradiol    | EE2             |             | 6.05            |                |
| 12 | 4     |                        |              |               | 17 beta-Estradiol             | E2              |             | 6.09            |                |
| 13 | 4     |                        |              |               | Equilenin                     |                 |             | 0.87            |                |
| 14 | 4     |                        |              |               | Equilin                       |                 |             | 10.6            |                |
| 15 | 4     |                        |              |               | Estrone                       | E1              |             | 4.33            |                |
| 16 | 5     | Hormones (positive)    | MLA 072      |               | Allyl Trenbolone              |                 |             | 1.02            |                |
| 17 | 5     |                        |              |               | Androstenedione               |                 |             | 2.16            |                |
| 18 | 5     |                        |              |               | Androsterone                  |                 |             | 28.0            |                |
| 19 | 5     |                        |              |               | Desogestrel                   |                 |             | 254             |                |
| 20 | 5     |                        |              |               | Estriol                       |                 |             | 20.3            |                |
| 21 | 5     |                        |              |               | Mestranol                     | MeEE2           |             | 54.1            |                |
| 22 | 5     |                        |              |               | Norethindrone                 |                 |             | 4.33            |                |
| 23 | 5     |                        |              |               | Norgestrel                    |                 |             | 4.33            |                |
| 24 | 5     |                        |              |               | Progesterone                  |                 |             | 0.87            |                |
| 25 | 5     |                        |              |               | Testosterone                  |                 |             | 1.04            |                |

|    | Class | Analyte class            | Method water                            | Method tissue | Analyte                     | Abbrev  | Common name | Water RL (ng/L)       | Tiss RL (ng/g) |
|----|-------|--------------------------|-----------------------------------------|---------------|-----------------------------|---------|-------------|-----------------------|----------------|
| 26 | 6     | Perfluorinated compounds | MLA 060                                 | MLA 043       | Perfluorobutanoate          | PFBA    |             | 0.95                  | 0.50           |
| 27 | 6     |                          |                                         |               | Perfluorobutanesulfonate    | PFBS    |             | 1.90                  | 1.01           |
| 28 | 6     |                          |                                         |               | Perfluorodecanoate          | PFDA    |             | 0.95                  | 0.50           |
| 29 | 6     |                          |                                         |               | Perfluorododecanoate        | PFDoA   |             | 0.95                  | 0.50           |
| 30 | 6     |                          |                                         |               | Perfluoroheptanoate         | PFHpA   |             | 0.95                  | 0.50           |
| 31 | 6     |                          |                                         |               | Perfluorohexanoate          | PFHxA   |             | 0.95                  | 0.50           |
| 32 | 6     |                          |                                         |               | Perfluorohexanesulfonate    | PFHxS   |             | 1.90                  | 1.01           |
| 33 | 6     |                          |                                         |               | Perfluorononanoate          | PFNA    |             | 0.95                  | 0.50           |
| 34 | 6     |                          |                                         |               | Perfluorooctanoate          | PFOA    |             | 0.95                  | 0.50           |
| 35 | 6     |                          |                                         |               | Perfluorooctanesulfonate    | PFOS    |             | 1.90                  | 1.01           |
| 36 | 6     |                          |                                         |               | Perfluorooctane sulfonamide | PFOSA   |             | 0.95                  | 0.60           |
| 37 | 6     |                          |                                         |               | Perfluoropentanoate         | PFPeA   |             | 0.95                  | 0.50           |
| 38 | 6     |                          |                                         |               | Perfluoroundecanoate        | PFUnA   |             | 0.95                  | 0.50           |
| 39 | 7     |                          |                                         |               | Phthalate ester metabolites | MLA 059 |             | Mono-methyl phthalate | MMP            |
| 40 | 7     |                          | Mono-n-butyl phthalate                  | MBP           |                             |         |             | 0.20                  |                |
| 41 | 7     |                          | Mono-benzyl phthalate                   | MBzP          |                             |         |             | 0.20                  |                |
| 42 | 7     |                          | Mono-cyclohexyl phthalate               | MCHP          |                             |         |             | 0.20                  |                |
| 43 | 7     |                          | Mono-3-carboxypropyl phthalate          | MCPP          |                             |         |             | 0.20                  |                |
| 44 | 7     |                          | Mono-(2-ethyl-5-hydroxyhexyl) phthalate | MEHHP         |                             |         |             | 0.20                  |                |
| 45 | 7     |                          | Mono-2-ethylhexyl phthalate             | MEHP          |                             |         |             | 0.20                  |                |
| 46 | 7     |                          | Mono-(2-ethyl-5-oxohexyl) phthalate     | MEOHP         |                             |         |             | 0.20                  |                |
| 47 | 7     |                          | Mono-ethyl phthalate                    | MEP           |                             |         |             | 0.20                  |                |
| 48 | 7     |                          | Mono-isononyl phthalate                 | MiNP          |                             |         |             | 0.20                  |                |
| 49 | 8     | PPCP (ANEG)              | MLA 075                                 | MLA 075       | Bisphenol A                 | BPA     |             | 541                   | 195            |
| 50 | 8     |                          |                                         |               | Furosemide                  |         | Lasix       | 43.3                  | 15.6           |
| 51 | 8     |                          |                                         |               | Gemfibrozil                 |         | Lopid       | 1.62                  | 0.58           |
| 52 | 8     |                          |                                         |               | Glipizide                   |         | Glucotrol   | 6.49                  | 2.33           |
| 53 | 8     |                          |                                         |               | Glyburide (Glibenclamide)   |         | Glynase     | 3.24                  | 1.17           |

|    | Class | Analyte class | Method water | Method tissue | Analyte                             | Abbrev           | Common name | Water RL (ng/L) | Tiss RL (ng/g) |
|----|-------|---------------|--------------|---------------|-------------------------------------|------------------|-------------|-----------------|----------------|
| 54 | 8     |               |              |               | Hydrochlorothiazide                 |                  | Esidrix     | 16.0            | 5.76           |
| 55 | 8     |               |              |               | Ibuprofen                           |                  | Advil       | 16.2            | 5.84           |
| 56 | 8     |               |              |               | 2-Hydroxy-ibuprofen                 | Ibuprofen<br>2OH |             | 86.5            | 31.1           |
| 57 | 8     |               |              |               | Naproxen                            |                  | Aleve       | 3.24            | 1.17           |
| 58 | 8     |               |              |               | Triclocarban                        |                  |             | 3.24            | 1.17           |
| 59 | 8     |               |              |               | Triclosan                           |                  |             | 64.9            | 23.3           |
| 60 | 8     |               |              |               | Warfarin                            |                  | Coumadin    | 1.62            | 1.55           |
| 61 | 9     | PPCP (APOS)   | MLA 075      | MLA 075       | Acetaminophen                       |                  | Tylenol     | 16.2            | 5.84           |
| 62 | 9     |               |              |               | Azithromycin                        |                  | Zithromax   | 2.04            | 1.23           |
| 63 | 9     |               |              |               | Caffeine                            |                  |             | 16.2            | 5.84           |
| 64 | 9     |               |              |               | Carbadox                            |                  |             | 1.62            | 0.58           |
| 65 | 9     |               |              |               | Carbamazepine                       |                  | Tegretol    | 1.62            | 0.58           |
| 66 | 9     |               |              |               | Cefotaxime                          |                  | Claforan    | 6.49            | 2.33           |
| 67 | 9     |               |              |               | Ciprofloxacin                       | Cipro            | Cipro       | 6.49            | 5.58           |
| 68 | 9     |               |              |               | Clarithromycin                      |                  | Biaxin      | 1.62            | 0.58           |
| 69 | 9     |               |              |               | Clinafloxacin                       |                  |             | 13.9            | 11.1           |
| 70 | 9     |               |              |               | Cloxacillin                         |                  |             | 3.24            | 3.60           |
| 71 | 9     |               |              |               | Dehydro Nifedipine                  |                  |             | 0.65            | 0.23           |
| 72 | 9     |               |              |               | Digoxigenin                         |                  |             | 130             | 2.33           |
| 73 | 9     |               |              |               | Digoxin                             |                  | Lanoxin     | 6.49            | 2.81           |
| 74 | 9     |               |              |               | Diltiazem                           |                  | Cardizem    | 0.32            | 0.63           |
| 75 | 9     |               |              |               | 1,7-Dimethylxanthine (paraxanthine) |                  | Theobromine | 64.9            | 23.3           |
| 76 | 9     |               |              |               | Diphenhydramine                     |                  | Benadryl    | 0.65            | 0.23           |
| 77 | 9     |               |              |               | Enrofloxacin                        |                  | Baytril     | 3.24            | 1.17           |
| 78 | 9     |               |              |               | Erythromycin-H2O                    |                  | Ilotycin    | 2.49            | 0.90           |
| 79 | 9     |               |              |               | Flumequine                          |                  |             | 1.62            | 1.41           |
| 80 | 9     |               |              |               | Fluoxetine                          |                  | Prozac      | 1.62            | 0.58           |
| 81 | 9     |               |              |               | Lincomycin                          |                  | Lincocin    | 3.24            | 1.36           |
| 82 | 9     |               |              |               | Lomefloxacin                        |                  | Maxaquin    | 3.53            | 1.50           |

|     | Class | Analyte class | Method water | Method tissue | Analyte                  | Abbrev        | Common name | Water RL (ng/L) | Tiss RL (ng/g) |
|-----|-------|---------------|--------------|---------------|--------------------------|---------------|-------------|-----------------|----------------|
| 83  | 9     |               |              |               | Miconazole               |               | Monistat    | 1.62            | 1.14           |
| 84  | 9     |               |              |               | Norfloxacin              |               | Noroxin     | 18.4            | 18.6           |
| 85  | 9     |               |              |               | Norgestimate             |               |             | 6.75            | 16.5           |
| 86  | 9     |               |              |               | Ofloxacin                |               | Ocuflox     | 1.62            | 0.58           |
| 87  | 9     |               |              |               | Ormetoprim               |               |             | 0.65            | 0.23           |
| 88  | 9     |               |              |               | Oxacillin                |               | Bactocill   | 3.24            | 4.99           |
| 89  | 9     |               |              |               | Oxolinic Acid            |               |             | 2.44            | 0.32           |
| 90  | 9     |               |              |               | Penicillin G             |               |             | 3.24            | 1.20           |
| 91  | 9     |               |              |               | Penicillin V             |               |             | 3.24            | 2.03           |
| 92  | 9     |               |              |               | Roxithromycin            |               |             | 0.32            | 0.14           |
| 93  | 9     |               |              |               | Sarafloxacin             |               |             | 16.2            | 5.84           |
| 94  | 9     |               |              |               | Sulfachloropyridazine    |               |             | 1.62            | 0.67           |
| 95  | 9     |               |              |               | Sulfadiazine             |               |             | 1.62            | 0.58           |
| 96  | 9     |               |              |               | Sulfadimethoxine         |               |             | 0.32            | 0.18           |
| 97  | 9     |               |              |               | Sulfamerazine            |               |             | 0.65            | 0.60           |
| 98  | 9     |               |              |               | Sulfamethazine           |               |             | 1.34            | 0.89           |
| 99  | 9     |               |              |               | Sulfamethizole           |               |             | 0.65            | 0.80           |
| 100 | 9     |               |              |               | Sulfamethoxazole         |               |             | 0.75            | 0.68           |
| 101 | 9     |               |              |               | Sulfanilamide            |               |             | 16.2            | 5.84           |
| 102 | 9     |               |              |               | Sulfathiazole            |               |             | 1.62            | 0.96           |
| 103 | 9     |               |              |               | Thiabendazole            |               | Mintezol    | 1.62            | 0.58           |
| 104 | 9     |               |              |               | Trimethoprim             |               | Proloprim   | 1.62            | 0.58           |
| 105 | 9     |               |              |               | Tylosin                  |               |             | 6.49            | 2.33           |
| 106 | 9     |               |              |               | Virginiamycin M1         |               |             | 3.68            | 3.23           |
| 107 | 10    | PPCP (APOSX)  | MLA 075      | MLA 075       | Alprazolam               |               | Xanax       | 0.32            | 0.12           |
| 108 | 10    |               |              |               | Amitriptyline            |               | Elavil      | 0.37            | 0.12           |
| 110 | 10    |               |              |               | 10-hydroxy-amitriptyline | 10-OH amitrip |             | 0.16            | 0.06           |
| 109 | 10    |               |              |               | Amlodipine               |               | Norvasc     | 1.62            | 0.58           |
| 111 | 10    |               |              |               | Benzoyllecgonine         |               | Esterom     | 0.32            | 0.17           |
| 112 | 10    |               |              |               | Benztropine              |               | Cogentin    | 0.54            | 0.20           |

|     | Class | Analyte class | Method water | Method tissue | Analyte                                     | Abbrev | Common name  | Water RL (ng/L) | Tiss RL (ng/g) |
|-----|-------|---------------|--------------|---------------|---------------------------------------------|--------|--------------|-----------------|----------------|
| 113 | 10    |               |              |               | Betamethasone                               |        | Luxiq        | 2.42            | 1.36           |
| 114 | 10    |               |              |               | Cocaine                                     |        |              | 0.16            | 0.10           |
| 115 | 10    |               |              |               | <i>N,N</i> -Diethyl- <i>meta</i> -toluamide | DEET   | DEET         | 0.87            | 0.31           |
| 116 | 10    |               |              |               | Desmethyldiltiazem                          |        |              | 0.16            | 0.06           |
| 117 | 10    |               |              |               | Diazepam                                    |        | Valium       | 0.32            | 0.46           |
| 118 | 10    |               |              |               | Fluocinonide                                |        | Lidex        | 6.49            | 5.94           |
| 119 | 10    |               |              |               | Fluticasone propionate                      |        | Flonase      | 2.68            | 5.28           |
| 120 | 10    |               |              |               | Meprobamate                                 |        | Miltown      | 4.33            | 2.30           |
| 121 | 10    |               |              |               | Methylprednisolone                          |        | Medrol       | 6.79            | 6.52           |
| 122 | 10    |               |              |               | Metoprolol                                  |        | Lopressor    | 3.01            | 1.81           |
| 123 | 10    |               |              |               | Norfluoxetine                               |        | Seproxetine  | 1.62            | 0.58           |
| 124 | 10    |               |              |               | Norverapamil                                |        |              | 0.16            | 0.09           |
| 125 | 10    |               |              |               | Paroxetine                                  |        | Paxil        | 4.33            | 1.56           |
| 126 | 10    |               |              |               | Prednisolone                                |        | Orapred      | 8.53            | 13.0           |
| 127 | 10    |               |              |               | Prednisone                                  |        | Deltasone    | 36.9            | 112            |
| 128 | 10    |               |              |               | Promethazine                                |        | Phenergan    | 1.44            | 0.52           |
| 129 | 10    |               |              |               | Propoxyphene                                |        | Darvon       | 0.32            | 0.12           |
| 130 | 10    |               |              |               | Propranolol                                 |        | Inderal      | 2.16            | 0.78           |
| 131 | 10    |               |              |               | Sertraline                                  |        | Zoloft       | 0.43            | 0.16           |
| 132 | 10    |               |              |               | Simvastatin                                 |        | Zocor        | 21.6            | 7.78           |
| 133 | 10    |               |              |               | Theophylline                                |        | Elixophyllin | 107             | 89.3           |
| 134 | 10    |               |              |               | Trenbolone                                  |        |              | 4.33            | 1.56           |
| 135 | 10    |               |              |               | Trenbolone acetate                          |        |              | 0.38            | 0.25           |
| 136 | 10    |               |              |               | Valsartan                                   |        | Diovan       | 4.33            | 1.56           |
| 137 | 10    |               |              |               | Verapamil                                   |        | Calan        | 0.16            | 0.06           |
| 138 | 11    | PPCP (BPOS)   | MLA 075      | MLA 075       | Albuterol (salbutamol)                      |        | Proventil    | 3.05            | 0.28           |
| 139 | 11    |               |              |               | Amphetamine                                 |        |              | 15.2            | 12.1           |
| 140 | 11    |               |              |               | Atenolol                                    |        | Tenormin     | 6.09            | 0.57           |
| 141 | 11    |               |              |               | Atorvastatin                                |        | Lipitor      | 15.2            | 1.42           |
| 142 | 11    |               |              |               | Cimetidine                                  |        | Tagamet      | 6.09            | 0.57           |
| 143 | 11    |               |              |               | Clonidine                                   |        | Kapvay       | 15.2            | 1.42           |

| Class | Analyte class | Method water                | Method tissue | Analyte     | Abbrev | Common name | Water RL (ng/L) | Tiss RL (ng/g) |
|-------|---------------|-----------------------------|---------------|-------------|--------|-------------|-----------------|----------------|
| 144   | 11            |                             |               | Codeine     |        |             | 30.5            | 2.83           |
| 145   | 11            |                             |               | Cotinine    |        |             | 15.2            | 1.42           |
| 146   | 11            |                             |               | Enalapril   |        | Vasotec     | 3.05            | 0.28           |
| 147   | 11            |                             |               | Hydrocodone |        |             | 15.2            | 1.42           |
| 148   | 11            |                             |               | Metformin   |        | Glucophage  | 30.5            | 2.83           |
| 149   | 11            |                             |               | Oxycodone   |        | Oxycontin   | 6.09            | 0.69           |
| 150   | 11            |                             |               | Ranitidine  |        | Rantacid    | 6.09            | 0.59           |
| 151   | 11            |                             |               | Triamterene |        | Dyrenium    | 3.05            | 0.28           |
| 152   | 12            | Triclosan (specific method) | MLA 083       | Triclosan   |        |             | 5.08            |                |

RL is approximate reporting limit for each analyte in water or tissue. Method refers to the analytical method used for extraction and analytical determination for each compound by AXYS Analytical Services LTD, Sidney, B.C., Canada.



Table S2. Half-life, pKa, K<sub>ow</sub>, usage, and mechanism of action for all detected analytes.

|    | Analyte          | Kow  | pKa          | Half-life     |                    |                        | Use                      | MoA                                                                                                    | WHO List |
|----|------------------|------|--------------|---------------|--------------------|------------------------|--------------------------|--------------------------------------------------------------------------------------------------------|----------|
|    |                  |      |              | Mammal        | Fish               | Sediment               |                          |                                                                                                        |          |
| 1  | Albuterol        | 0.3  | 10.3         | 4 – 6 h (H)   |                    |                        | Bronchodilation          | β <sub>2</sub> -adrenergic receptor agonist                                                            | Y        |
| 2  | Alprazolam       | 2.1  | 5.1/<br>18.3 | 16 h (H)      |                    |                        | Anti-anxiety             | Unknown, CNS depressant                                                                                |          |
| 3  | Amitriptyline    | 5    | 9.4          | 10 – 50 h (H) |                    |                        | Antidepressant           | SSRI                                                                                                   | Y        |
| 4  | 10-OH-Amitrip    | 3.84 | 9.8/<br>14.3 |               |                    |                        | Antidepressant           | SSRI                                                                                                   |          |
| 5  | Amlodipine       | 3.0  | 8.8          | 30 – 50 h     |                    |                        | Hypertension             | Calcium channel blocker                                                                                | Y        |
| 6  | Amphetamine      | 1.8  | 10.1         | 10 – 12 h (H) |                    |                        | Stimulant                | ↓ Uptake of adrenergics and dopamine, stimulates release of monoamines, and inhibits monoamine oxidase |          |
| 7  | Androstenedione  | 2.7  |              |               |                    |                        | Enhance testosterone     | Precursor of male and female sex hormones                                                              |          |
| 8  | Atenolol         | 0.2  | 9.6          | 7 h (H)       |                    |                        | Antiarrhythmic           | β <sub>1</sub> -selective adrenoceptor blocking agent                                                  |          |
| 9  | Atorvastatin     | 5    | 4.46         | 20 h (H)      |                    |                        | Lower cholesterol        | ↓ Hydroxymethylglutaryl-coenzyme A (HMG-CoA) reductase                                                 |          |
| 10 | Azithromycin     | 4.0  | 8.74         | 68 h (H)      | 353 h (wb)         | 1 – 2.7 y <sup>2</sup> | Antibiotic               | ↓ Protein synthesis, binds 23S rRNA part of 50S ribosomal subunit                                      | Y        |
| 11 | Benzoyllecgonine | -0.3 |              |               |                    |                        | Cocaine metabolite       | Topical analgesic                                                                                      |          |
| 12 | Benztropine      | 4.5  |              | 12 – 24 h (H) |                    |                        | Parkinson's disease      | Muscarinic antagonist                                                                                  |          |
| 13 | Bisphenol A      | 3.3  | 9.6          | 21 h (H)      | 139 h (wb)         |                        | Monomer of polycarbonate | Oxidative stress, endocrine disruption                                                                 |          |
| 14 | Caffeine         | -0.1 | 14/0.7       | 5 h (H)       | 141 h <sup>1</sup> |                        | Stimulant                | CNS stimulant                                                                                          |          |

| Analyte                 | Kow     | pKa      | Half-life       |                    |                    | Use                                                 | MoA                                                                                       | WHO List |
|-------------------------|---------|----------|-----------------|--------------------|--------------------|-----------------------------------------------------|-------------------------------------------------------------------------------------------|----------|
|                         |         |          | Mammal          | Fish               | Sediment           |                                                     |                                                                                           |          |
| 15 Carbamazepine        | 2.5     | 13.9     | 36 h (H)        | 71 hr <sup>1</sup> | 495 d <sup>2</sup> | Anticonvulsant                                      | Stabilizes inactivated state of voltage-gated sodium channels. Also GABA receptor agonist | Y        |
| 16 Cimetidine           | 0.4     | 6.8      | 3 h (H)         |                    |                    | Inhibits gastric acid secretion                     | ↓Histamine H2 receptor                                                                    |          |
| 17 Ciprofloxacin        | -1.1    | 6.1      | 3 – 7 h (H)     | 11 – 20 h (plasma) | 6.3 y <sup>2</sup> | Antibiotic                                          | ↓DNA gyrase, a type II topoisomerase                                                      | Y        |
| 18 Clarithromycin       | 3.2     | 8.9      | 4 – 11 h (H)    |                    |                    | Antibiotic                                          | ↓Protein synthesis, binds 23S rRNA part of 50S ribosomal subunit                          | Y        |
| 19 Cocaine              | 2.3     | 8.6      | 0.7 – 1.5 h (H) |                    |                    | Anesthetic and vasoconstrictor                      | ↓ Dopamine uptake                                                                         |          |
| 20 Codeine              | 1.1     | 10.6     | 3 h (H)         |                    |                    | Analgesic                                           | Opioid agonist                                                                            | Y        |
| 21 Cotinine             | -0.3    |          | 21 h (H)        |                    |                    | Nicotine metabolite                                 | Dopamine agonist via nicotinic receptors                                                  |          |
| 22 DEET                 | 2       |          | 2.5 h (H)       |                    |                    | Insect repellent                                    | Binds odorant binding protein 1                                                           |          |
| 23 Dimethylxanthine 1,7 | -0.2    | 9.9      | 6 – 10 h (H)    |                    |                    | Primary metabolite caffeine                         | CNS stimulant                                                                             |          |
| 24 Nifedipine (Dehydro) | 2.8     |          |                 |                    |                    | Metabolite of Nifedipine (vasodilator)              | Calcium channel blocker (class II)                                                        | Y        |
| 25 Diazepam             | 3       | 3.4      | 1.5 d (H)       |                    |                    | Antianxiety, anticonvulsant, sedative               | ↑GABA activity                                                                            | Y        |
| 26 Diltiazem            | 2.7     | 8.06     | 3 – 4.5 h (H)   | 117 h <sup>1</sup> |                    | Vasodilator                                         | Calcium channel blocker                                                                   |          |
| 27 Desmethyldiltiazem   | 2.3–3.0 | 9.2–12.9 |                 |                    |                    | Hypertension, arrhythmia<br>Metabolite of diltiazem | Calcium channel blocker                                                                   |          |
| 28 Diphenhydramine      | 3.3     | 9.0      | 3 – 17 h (H)    | 34 h <sup>1</sup>  | 3 y <sup>2</sup>   | Antihistamine                                       | Inverse agonist of the histamine H1 receptor                                              |          |

| Analyte                | Kow       | pKa     | Half-life     |                   |                    | Use                                               | MoA                                                              | WHO List |
|------------------------|-----------|---------|---------------|-------------------|--------------------|---------------------------------------------------|------------------------------------------------------------------|----------|
|                        |           |         | Mammal        | Fish              | Sediment           |                                                   |                                                                  |          |
| 29 Enalapril           | -0.1      | 3/5.4   | <2h (H)       |                   |                    | Reduce blood pressure                             | Angiotensin converting enzyme inhibitor                          | Y        |
| 30 Erythromycin-H2O    | 2.7       | 8.88    | 1.6 h (H)     | 216 h (wb)        |                    | Antibiotic                                        | ↓Protein synthesis, binds 23S rRNA part of 50S ribosomal subunit | Y        |
| 31 Estrone             | 3.1       |         | 19 h (H)      |                   |                    | Naturally produced estrogen - hormone replacement | Binds estrogen receptor                                          |          |
| 32 Fluocinonide        | 3.2       |         |               |                   |                    | Glucocorticoid for eczema                         | Corticosteroid hormone receptor agonist                          |          |
| 33 Fluoxetine          | 4.1       | 9.8     | 4 – 5 d (H)   |                   | > 3 y <sup>2</sup> | Anti-depressant                                   | SSRI                                                             | Y        |
| 34 Furosemide          | 2         | 3.8/7.5 | 1.5 h (H)     |                   |                    | Diuretic                                          | Inhibits Na-K-Cl cotransporter                                   | Y        |
| 35 Gemfibrozil         | 4.77      | 4.5     | 1.5 h (H)     | 19 h (plasma)     | 227 d <sup>2</sup> | ↓Lipids                                           | PPAR α agonist                                                   |          |
| 36 Glipizide           | 1.9       | 5.9     | 2 – 5 h (H)   |                   |                    | Hypoglycemic agent for type 2 diabetes            | Binds to ATP-sensitive K-channel receptors                       |          |
| 37 Glyburide           | 4.8       |         | 1.5 h (H)     |                   |                    | Antidiabetic                                      | Regulator of ATP-sensitive K+ channels and insulin release       | Y        |
| 38 γ-HBCDD             | 7.1       |         |               |                   |                    | Flame retardant                                   | ↑FSH and protein kinase B                                        |          |
| 39 α-HBCDD             | 5.6 – 7.7 | -       | Months in fat |                   |                    | Flame retardant                                   | ↑FSH and protein kinase B                                        |          |
| 40 Hydrochlorothiazide | -0.1      | 7.9     |               |                   |                    | Diuretic                                          | Inhibits NaCl symporters                                         | Y        |
| 41 Hydrocodone         | 2.2       | 8.23    | 3.8 h (H)     |                   |                    | Narcotic analgesic                                | Opioid agonist                                                   |          |
| 42 Ibuprofen           | 3.5       | 4.9     | 2 h (H)       | 32 h <sup>1</sup> |                    | Nonsteroidal anti-inflammatory                    | ↓Cyclooxygenase                                                  | Y        |
| 43 2-OH-Ibuprofen      | 2.1       |         |               |                   |                    | Ibuprofen metabolite                              | -                                                                |          |
| 44 Lincomycin          | 0.2       | 7.6     | 4 – 6 h (H)   |                   |                    | Antibiotic                                        | ↓Protein synthesis, binds 23S rRNA part of 50S ribosomal subunit |          |

| Analyte          | Kow       | pKa       | Half-life    |                                             |                             | Use                             | MoA                                    | WHO List |
|------------------|-----------|-----------|--------------|---------------------------------------------|-----------------------------|---------------------------------|----------------------------------------|----------|
|                  |           |           | Mammal       | Fish                                        | Sediment                    |                                 |                                        |          |
| 45 MBP           | 3.1       |           |              |                                             |                             | Metabolite of DBP plasticizers  | Endocrine / metabolic disruptor        |          |
| 46 MEHP          | 4         |           |              |                                             |                             | Metabolite of DEHP plasticizers | Endocrine / metabolic disruptor        |          |
| 47 Meprobamate   | 0.7       |           | 6 – 16 h (H) |                                             |                             | Carbamate for anxiety           | Adrenergic beta-antagonist             |          |
| 48 Metformin     | -1.3      | 12.4      | 8 – 12 h (H) |                                             |                             | Hypoglycemic agent              | ↑AMP-activated protein kinase          | Y        |
| 49 Metoprolol    | 1.9       | 9.68      | 3 – 7 h (H)  |                                             |                             | Arrhythmia, hypertension        | Adrenergic beta-1 antagonist           | Y        |
| 50 Miconazole    | 5.9 – 6.1 | 6.8       | 24 h         |                                             | 3.8 y <sup>2</sup>          | Antifungal                      | ↓Synthesis of ergosterol               | Y        |
| 51 Naproxen      | 3.3       | 4.15      | 13 h (H)     |                                             |                             | Analgesic and antipyretic       | ↓Cyclooxygenase                        |          |
| 52 Norfluoxetine | 3.5       | 9.8       | 4 – 16 d (H) |                                             |                             | Metabolite of fluoxetine        | SSRI                                   |          |
| 53 Norverapamil  | 3.3       | 10.3      | 5 h          |                                             |                             | Metabolite of verapamil         | Calcium channel blocker                |          |
| 54 4-NP          | 5.76      | 10        | 3 h (H)      | 20 h                                        | 14 – 99 d <sup>4</sup>      | Emulsifiers, solubilizers       | Oxidative stress, endocrine disruption |          |
| 55 NP1EO         | 5.8       |           |              |                                             | 69 – 116 d <sup>4</sup>     | Nonionic surfactant             | Potential endocrine disruptor          |          |
| 56 NP2EO         | 5.6       |           |              |                                             | 16 d (12.7 °C) <sup>3</sup> | Nonionic surfactant             | Potential endocrine disruptor          |          |
| 57 Ofloxacin     | -0.4      | 5.97/9.28 | 16 h (H)     |                                             | 3.8 y <sup>2</sup>          | Antibacterial                   | ↓DNA gyrase                            |          |
| 58 Ormetoprim    | 1.2       |           |              | 15 – 400 h (organs); 45 – 99 d (fat & skin) |                             | Antiprotozoal                   | Folic acid antagonist                  |          |

| Analyte         | Kow | pKa  | Half-life    |      |          | Use                                        | MoA                                             | WHO List |
|-----------------|-----|------|--------------|------|----------|--------------------------------------------|-------------------------------------------------|----------|
|                 |     |      | Mammal       | Fish | Sediment |                                            |                                                 |          |
| 59 Oxycodone    | 1.2 | 8.3  | 0.4 h (H)    |      |          | Analgesic                                  | Opioid agonist                                  |          |
| 60 Paroxetine   | 3.5 |      | 21 h (H)     |      |          | Treat depression                           | SSRI                                            |          |
| 61 PFBA         | 2.2 |      |              |      |          | Breakdown product of PFCs                  |                                                 |          |
| 62 PFBS         | 2.3 |      | 30 d (H)     |      |          | Replaces PFOS                              |                                                 |          |
| 63 PFDA         | 6.3 |      |              |      |          | Surfactant                                 | ↑ Peroxisomal beta-oxidation                    |          |
| 64 PFHpA        | 4.3 |      |              |      |          | Surfactant                                 |                                                 |          |
| 65 PFHxA        | 3.6 |      |              |      |          | Breakdown product of PFCs                  |                                                 |          |
| 66 PFHxS        | 3.7 |      | Years (H)    |      |          |                                            |                                                 |          |
| 67 PFNA         | 5.6 |      |              |      |          | Breakdown product of PFCs                  | ↑ Peroxisomal beta-oxidation, apoptosis         |          |
| 68 PFOA         | 4.9 | 2.8  | 4.4 y (H)    |      |          | Surfactant                                 | ↑ Peroxisomal enzymes                           |          |
| 69 PFOS         | 6.3 | 0.14 | 5.4 y (H)    |      |          | Surfactant                                 | Oxidative stress, lipid peroxidation, apoptosis |          |
| 70 PFOSA        | 4.8 |      | 8.7 y (H)    |      |          | Surfactant, Metabolized to PFOS            | Neurotoxic, uncouple oxidative phosphorylation  |          |
| 71 PFPeA        | 2.9 |      |              |      |          | Breakdown product of PFCs                  |                                                 |          |
| 72 Promethazine | 4.8 | 9.1  | 9 – 16 (H)   |      |          | Antihistamine, antiemetic, anticholinergic | Histamine H1-blocking, antimuscarinic           |          |
| 73 Propoxyphene | 4.2 |      | 6 – 12 h (H) |      |          | Narcotic analgesic                         | Opioid agonist                                  |          |
| 74 Propranolol  | 3   | 9.42 | 4 h (H)      |      |          | Arrhythmia, angina, hypertension           | Beta-adrenergic antagonist                      | Y        |
| 75 Ranitidine   | 0.3 |      | 2 – 3 h (H)  |      |          | Treat ulcers                               | Histamine H2 receptor antagonist                | Y        |

| Analyte | Kow              | pKa  | Half-life |           |                    | Use                | MoA                                                              | WHO List                                                                 |   |
|---------|------------------|------|-----------|-----------|--------------------|--------------------|------------------------------------------------------------------|--------------------------------------------------------------------------|---|
|         |                  |      | Mammal    | Fish      | Sediment           |                    |                                                                  |                                                                          |   |
| 76      | Roxithromycin    | 3.1  |           | 12 h (H)  |                    | Antibiotic         | ↓Protein synthesis, binds 23S rRNA part of 50S ribosomal subunit |                                                                          |   |
| 77      | Sertraline       | 5.1  | 9.5       | 25-26 h   |                    | Anti-depressant    | SSRI                                                             |                                                                          |   |
| 78      | Simvastatin      | 4.7  |           | 3 h (H)   |                    | Reduce lipids      | ↓HMG-CoA reductase                                               | Y                                                                        |   |
| 79      | Sulfadiazine     | -0.1 | 6.36      |           | 26 – 96 h (plasma) | Antibiotic         | ↓Folate production                                               | Y                                                                        |   |
| 80      | Sulfadimethoxine | 1.6  |           |           | 99 h (wb)          | Antibiotic         | ↓Folate production                                               |                                                                          |   |
| 81      | Sulfamerazine    | 0.1  |           |           |                    | Antibiotic         | Binds to dihydrofolate synthetase, ↓folate                       |                                                                          |   |
| 82      | Sulfamethoxazole | 0.9  | 1.6/5.7   | 10 h (H)  | 26 h (wb)          | Antibiotic         | Cytochrome P450 2C9 Inhibitor, ↓folate                           | Y                                                                        |   |
| 83      | Testosterone     | 3.3  |           | 2 h (H)   | 2 h (wb)           | 403 (soil)         | Androgenic steroid                                               | Control pituitary LH and FSH secretion                                   | Y |
| 84      | Thiabendazole    | 2.5  | 4.6       | 1.7 h (H) |                    | 403 d              | Nematicide, fungicide                                            | ↓Fumarate reductase                                                      |   |
| 85      | Triamterene      | 1    |           | 4.2 h (H) |                    |                    | Diuretic                                                         | ↓Na reabsorption via Na channels                                         |   |
| 86      | Triclocarban     | 5.3  | 12.7      | 10 h (H)  | 1 h (wb)           | > 3 y <sup>2</sup> | Antiseptic                                                       | ↓Fatty acid synthesis                                                    |   |
| 87      | Triclosan        | 4.76 | 7.9       | 21 h (H)  |                    | 187 d              | Antiseptic                                                       | ↓Fatty acid synthesis                                                    |   |
| 88      | Trimethoprim     | 0.9  | 7.1       | 11 h (H)  | 50 – 100 h (wb)    |                    | Antibiotic                                                       | ↓Dihydrofolate reductase                                                 | Y |
| 89      | Valsartan        | 4.4  | 3.8       | 6 h (H)   |                    |                    | Cardiac conditions                                               | Angiotensin II receptor antagonist                                       |   |
| 90      | Verapamil        | 3.8  | 8.9       | 3 h       |                    |                    | Hypertension, angina, arrhythmia                                 | Calcium channel (L-type) blocker                                         | Y |
| 91      | Virginiamycin M1 | 2.5  |           |           |                    |                    | Antibiotic                                                       | ↓Peptide chain (peptidyl-tRNA) linked to 50S ribosome and aminoacyl-tRNA |   |
| 92      | Warfarin         | 2.7  | 5.1       | 40 h (H)  |                    |                    | Anitcoagulant                                                    | ↓Synthesis vitamin K-dependent coagulation factors                       | Y |

All values for Kow, pKa, human half-life, usage, and mechanism or mode of action (MoA) from PubChem (2015), Toxnet (2015), EWG (2015), DrugBank (2015), Chemspider (2015), and Wikipedia (2015). List of essential medicines from WHO (2015). Fish half-life from Phish-Pharm or literature. Human half-life mostly for plasma. If compound exhibits acid and base ionization, the pKa for acid is shown first, then pKa for base. pKa1 is followed by pKa2. ↓↑Decrease or increase for parameter. Abbreviations are: H= *Homo sapiens*. h= hours, d= days, y= years, wb= whole body. PFC is perfluorinated compounds. SSRI is selective serotonin reuptake inhibitor. PPAR $\alpha$  is peroxisome proliferator activator receptor alpha, FSH = Follicle-stimulating hormone, HMG-CoA is 3-hydroxy-3-methylglutaryl coenzyme A. Analyte abbreviations in Table S1. DBP is dibutyl phthalate, and DEHP is diethylhexyl phthalate. References: 1. Wang and Gardinali (2012). 2. Walters et al. (2010), 3. Gonzalez et al. (2012), 4. Yuan et al. (2004).

Table S3. Analytes that were not detected in effluent, estuary water, or fish tissue.

|    | Class | Analyte class               | Analyte                    | RL            |                |
|----|-------|-----------------------------|----------------------------|---------------|----------------|
|    |       |                             |                            | Water<br>ng/L | Tissue<br>ng/g |
| 1  | 1     | AP and APE                  | Octylphenol                | 2.35          | 0.46           |
| 2  | 3     | HBCDD flame retardants      | beta-HBCDD                 |               | 0.10           |
| 3  | 4     | Hormones (negative)         | 17 alpha-Dihydroequilin    | 4.33          |                |
| 4  | 4     |                             | 17 alpha-Estradiol         | 4.33          |                |
| 5  | 4     |                             | 17 alpha-Ethinyl-Estradiol | 6.05          |                |
| 6  | 4     |                             | 17 beta-Estradiol          | 6.09          |                |
| 7  | 4     |                             | Equilenin                  | 0.87          |                |
| 8  | 4     |                             | Equilin                    | 10.6          |                |
| 9  | 5     | Hormones (positive)         | Allyl Trenbolone           | 1.02          |                |
| 10 | 5     |                             | Androsterone               | 28.0          |                |
| 11 | 5     |                             | Desogestrel                | 254.0         |                |
| 12 | 5     |                             | Estriol                    | 20.3          |                |
| 13 | 5     |                             | Mestranol*                 | 168           |                |
| 14 | 5     |                             | Norethindrone              | 4.33          |                |
| 15 | 5     |                             | Norgestrel                 | 4.33          |                |
| 16 | 5     |                             | Progesterone               | 0.87          |                |
| 17 | 6     | Perfluorinated              | PFUnA                      | 0.95          | 0.50           |
| 18 | 6     |                             | PFDoA                      | 0.95          | 0.50           |
| 19 | 7     | Phthalate ester metabolites | MMP                        | 0.20          |                |
| 20 | 7     |                             | MEP                        | 0.20          |                |
| 21 | 7     |                             | MBzP                       | 0.20          |                |
| 22 | 7     |                             | MEOHP                      | 0.20          |                |
| 23 | 7     |                             | MEHHP                      | 0.20          |                |
| 24 | 7     |                             | MCPP                       | 0.20          |                |
| 25 | 7     |                             | MCHP                       | 0.20          |                |
| 26 | 7     |                             | MiNP                       | 0.20          |                |
| 27 | 9     | PPCP (APOS)                 | Acetaminophen              | 16.2          | 5.84           |
| 28 | 9     |                             | Carbadox                   | 1.62          | 0.58           |
| 29 | 9     |                             | Cefotaxime                 | 6.49          | 2.33           |
| 30 | 9     |                             | Clinafloxacin              | 13.9          | 11.1           |
| 31 | 9     |                             | Cloxacillin                | 3.24          | 3.60           |



| Class | Analyte class | Analyte                       | RL            |                |
|-------|---------------|-------------------------------|---------------|----------------|
|       |               |                               | Water<br>ng/L | Tissue<br>ng/g |
| 32    | 9             | Digoxin                       | 6.49          | 2.81           |
| 33    | 9             | Digoxigenin                   | 130           | 2.33           |
| 34    | 9             | Enrofloxacin                  | 3.24          | 1.17           |
| 35    | 9             | Flumequine                    | 1.62          | 1.41           |
| 36    | 9             | Lomefloxacin                  | 3.53          | 1.50           |
| 37    | 9             | Norfloxacin                   | 18.4          | 18.6           |
| 38    | 9             | Norgestimate                  | 6.75          | 16.5           |
| 39    | 9             | Oxacillin                     | 3.24          | 4.99           |
| 40    | 9             | Oxolinic Acid                 | 2.44          | 0.32           |
| 41    | 9             | Penicillin G                  | 3.24          | 1.2            |
| 42    | 9             | Penicillin V                  | 3.24          | 2.03           |
| 43    | 9             | Sarafloxacin                  | 16.2          | 5.84           |
| 44    | 9             | Sulfachloropyridazine         | 1.62          | 0.67           |
| 45    | 9             | Sulfamethazine                | 1.34          | 0.89           |
| 46    | 9             | Sulfamethizole                | 0.65          | 0.80           |
| 47    | 9             | Sulfanilamide                 | 16.2          | 5.84           |
| 48    | 9             | Sulfathiazole                 | 1.62          | 0.96           |
| 49    | 9             | Tylosin                       | 6.49          | 2.33           |
| 50    | 10            | PPCP (APOSX)<br>Betamethasone | 2.42          | 1.36           |
| 51    | 10            | Fluticasone propionate        | 2.68          | 5.28           |
| 52    | 10            | Methylprednisolone            | 6.79          | 6.52           |
| 53    | 10            | Prednisolone                  | 8.53          | 13.0           |
| 54    | 10            | Prednisone                    | 36.9          | 112            |
| 55    | 10            | Theophylline                  | 107           | 89.3           |
| 56    | 10            | Trenbolone                    | 4.33          | 1.56           |
| 57    | 10            | Trenbolone acetate            | 0.38          | 0.25           |
| 58    | 11            | PPCP (BPOS)<br>Clonidine      | 15.2          | 1.42           |

RL = reporting limit. Abbreviations in Table S1. \* Mestranol was reported as detected in effluent (439 and 457 ng/L) and estuarine water (113 and 175 ng/L) but flagged (K-flag). A peak was detected but it did not meet quantification criteria. An interference at the expected mestranol retention time precluded positive identification for this compound.

Table S4. Observed concentrations for all analytes detected in water, bioconcentration factors, and sediment-water partition coefficients.

| Analytes                | <u>Sinclair Inlet</u> |              | <u>Puyallup</u> |              | <u>Nisqually</u> | <u>Partitioning</u>                          |             |
|-------------------------|-----------------------|--------------|-----------------|--------------|------------------|----------------------------------------------|-------------|
|                         | Effluent              | Estuary      | Effluent        | Estuary      | Estuary          | BCF                                          | Log Koc     |
|                         | 2014<br>ng/L          | 2014<br>ng/L | 2014<br>ng/L    | 2013<br>ng/L | 2013<br>ng/L     |                                              |             |
| 1 Albuterol             | 41                    | 12           | 36              |              |                  | 3                                            | 1.4         |
| 2 Alprazolam            | 3.0                   |              | 4.0             |              |                  |                                              |             |
| 3 Amitriptyline         | 119                   |              | 88              |              |                  | 1,226                                        | 4.05        |
| 4 Amitriptyline 10-OH   | 60                    | 0.19         | 43              | 0.21         |                  |                                              |             |
| 5 Amlodipine            | 9.7                   |              | 26              |              |                  | 4.4                                          | 2.3         |
| 6 Amphetamine           | 164                   | 29           | 67              | 2.2          |                  |                                              |             |
| 7 Androstenedione       | 8.4                   |              |                 |              |                  | 26                                           | 2.9         |
| 8 Atenolol              | 1700                  | 22           | 2440            | 3.4          | 1.2              |                                              |             |
| 9 Atorvastatin          |                       |              | 68              |              |                  | 56                                           |             |
| 10 Azithromycin         | 629                   | 2.2          | 261             |              |                  | 200                                          | 3.49        |
| 11 Benzoylcegonine      | 293                   | 0.51         | 151             | 0.78         | 0.5              |                                              |             |
| 12 Benzotropine         | 0.93                  |              | 0.57            |              |                  | 400                                          | 5.0         |
| 13 Bisphenol A          | 350                   | 2.8          | 4290            | 4.3          |                  | 5 – 73*                                      | 2.1 – 3.59* |
| 14 Caffeine             | 1170                  |              | 152             |              |                  | 2 <sup>1</sup>                               |             |
| 15 Carbamazepine        | 510                   |              | 735             | 1.9          |                  | 1.4 <sup>1</sup> , 4.2 (plasma) <sup>8</sup> |             |
| 16 Cimetidine           |                       |              | 194             |              |                  | 1.2                                          | 1.6         |
| 17 Ciprofloxacin        | 192                   |              | 158             |              | 7.3              | 3                                            | 4.78*       |
| 18 Clarithromycin       | 52                    |              | 181             |              |                  | 56                                           | 2.17        |
| 19 Cocaine              | 59                    |              | 8.5             |              | 0.28             | 3                                            | 2.78        |
| 20 Codeine              | 178                   |              | 290             |              |                  |                                              |             |
| 21 Cotinine             | 340                   |              | 115             |              |                  | 3                                            | 2.01        |
| 22 DEET                 | 684                   | 2.4          | 23              | 5.3          | 8.4              | 2*                                           | 2.48        |
| 23 Diazepam             | 2.2                   |              | 1.5             |              |                  | 33                                           | 2.8*        |
| 24 Diltiazem            | 390                   | 0.75         | 425             | 0.52         |                  | 16 <sup>1</sup> 24 (plasma) <sup>8</sup>     |             |
| 25 Desmethyldiltiazem   | 148                   |              | 82              |              |                  |                                              |             |
| 26 Dimethylxanthine-1,7 | 2060                  |              | 873             |              |                  |                                              |             |
| 27 Diphenhydramine      | 1240                  | 1.5          | 1030            | 1.2          | 0.96             | 16 <sup>1</sup>                              | 2.58        |
| 28 Enalapril            |                       |              | 5.6             |              |                  |                                              |             |
| 29 Erythromycin-H2O     | 138                   |              | 87              | 3.3          |                  | 49                                           | 2.75        |

| Analytes                | <u>Sinclair Inlet</u> |              | <u>Puyallup</u> |              | <u>Nisqually</u> | <u>Partitioning</u>                               |            |
|-------------------------|-----------------------|--------------|-----------------|--------------|------------------|---------------------------------------------------|------------|
|                         | Effluent              | Estuary      | Effluent        | Estuary      | Estuary          | BCF                                               | Log Koc    |
|                         | 2014<br>ng/L          | 2014<br>ng/L | 2014<br>ng/L    | 2013<br>ng/L | 2013<br>ng/L     |                                                   |            |
| 30 Estrone              | 58                    |              | 4.5             |              |                  | 54                                                | 2.7 – 4.3* |
| 31 Fluoxetine           | 57                    |              | 60              |              |                  | 30 (pH 8) <sup>2</sup>                            |            |
| 32 Furosemide           | 1290                  |              | 994             |              |                  | 3                                                 | 2.48       |
| 33 Gemfibrozil          | 1640                  | 3.4          | 1360            | 4.5          |                  | 3, 63 (plasma) <sup>3</sup>                       | 2.63       |
| 34 Glipizide            | 22                    |              | 22              |              |                  |                                                   |            |
| 35 Glyburide            | 11                    |              | 7.6             |              |                  |                                                   |            |
| 36 Hydrochlorothiazide  | 578                   |              | 411             |              |                  |                                                   |            |
| 37 Hydrocodone          | 74                    |              | 69              |              |                  | 9                                                 | 3.38       |
| 38 Ibuprofen            | 1060                  |              | 116             |              |                  | 28 <sup>1</sup> , 18,667<br>(plasma) <sup>3</sup> | 3.5        |
| 39 Ibuprofen 2-OH       | 4550                  |              | 1160            |              |                  | 28                                                |            |
| 40 Lincomycin           |                       |              | 27              |              |                  | 3                                                 | 1.8        |
| 41 MBP                  |                       |              |                 | 289          | 491              |                                                   |            |
| 42 MEHP                 |                       |              | 0.41            |              |                  |                                                   |            |
| 43 Meproamate           | 623                   |              | 513             |              |                  | 3                                                 | 1.8        |
| 44 Metformin            | 29300                 | 832          | 82700           | 105          |                  |                                                   |            |
| 45 Metoprolol           | 805                   |              | 835             |              |                  | 1.3                                               | 1.8        |
| 46 Miconazole           |                       |              | 4.9             |              |                  |                                                   |            |
| 47 Naproxen             | 701                   |              | 106             |              |                  | 3, 28 (plasma) <sup>8</sup>                       | 2.5        |
| 48 Nifedipine (dehydro) | 15                    |              | 13              |              |                  | 33                                                |            |
| 49 NP2EO                | 2610                  |              | 1690            |              |                  |                                                   |            |
| 50 NP1EO                | 1760                  |              | 1220            |              |                  |                                                   |            |
| 51 NP (4-)              | 506                   |              | 1690            | 41           | 14               | 945 <sup>4</sup>                                  | 4.5        |
| 52 Norfluoxetine        | 28                    |              | 17              |              |                  | 130 (pH 8) <sup>2</sup>                           |            |
| 53 Norverapamil         | 13                    |              | 14              |              |                  |                                                   |            |
| 54 Ofloxacin            | 387                   |              | 108             |              |                  | 3                                                 | 4.64*      |
| 55 Oxycodone            | 158                   |              | 231             |              |                  | 3                                                 | 2.08       |
| 56 Paroxetine           | 42                    |              | 6.6             |              |                  |                                                   |            |
| 57 PFBA                 |                       |              | 6.7             |              |                  |                                                   |            |
| 58 PFBS                 | 13                    |              |                 |              |                  |                                                   |            |
| 59 PFHpA                | 7.5                   |              | 3.0             |              |                  |                                                   |            |
| 60 PFHxA                | 53                    |              | 15              |              |                  | 4,750 <sup>5</sup>                                |            |

| Analytes            | <u>Sinclair Inlet</u> |              | <u>Puyallup</u> |              | <u>Nisqually</u> | Partitioning                        |                   |
|---------------------|-----------------------|--------------|-----------------|--------------|------------------|-------------------------------------|-------------------|
|                     | Effluent              | Estuary      | Effluent        | Estuary      | Estuary          | BCF                                 | Log Koc           |
|                     | 2014<br>ng/L          | 2014<br>ng/L | 2014<br>ng/L    | 2013<br>ng/L | 2013<br>ng/L     |                                     |                   |
| 61 PFHxS            | 55                    |              |                 |              |                  |                                     |                   |
| 62 PFNA             |                       |              | 2               |              |                  |                                     |                   |
| 63 PFOA             | 12                    |              | 7.6             |              |                  | 7.3 <sup>5</sup>                    | 2.96 <sup>6</sup> |
| 64 PFOS             | 461                   |              |                 |              |                  | 1,010 <sup>5</sup>                  | 3.79 <sup>6</sup> |
| 65 PFPeA            | 4.7                   |              | 3.4             |              |                  |                                     |                   |
| 66 Promethazine     |                       |              | 3.8             |              |                  |                                     |                   |
| 67 Propoxyphene     | 1.9                   |              | 0.70            |              |                  | 260                                 | 4.9               |
| 68 Propranolol      | 76                    |              | 109             |              |                  |                                     |                   |
| 69 Ranitidine       |                       |              | 494             |              | 0.75             |                                     |                   |
| 70 Roxithromycin    |                       |              | 3.8             |              |                  |                                     |                   |
| 71 Sertraline       | 116                   |              | 89              |              |                  | 138 (plasma) <sup>8</sup>           |                   |
| 72 Simvastatin      |                       |              | 34              |              |                  | 800                                 | 3.92              |
| 73 Sulfadimethoxine |                       | 0.46         | 8.2             |              |                  |                                     |                   |
| 74 Sulfamethoxazole |                       | 4.1          | 1380            | 3.4          | 1.5              | 3                                   | 1.86              |
| 75 Testosterone     |                       | 1.9          |                 |              |                  | 72                                  | 3.34              |
| 76 Thiabendazole    | 27                    |              | 24              |              |                  | 20                                  | 3.56              |
| 77 Triamterene      | 151                   |              | 156             |              |                  |                                     |                   |
| 78 Triclocarban     | 12                    |              | 17              |              |                  | 80 <sup>*</sup>                     | 4.08 <sup>*</sup> |
| 79 Triclosan        | 538                   | 5.2          | 250             |              |                  | 90 <sup>*</sup> , 4157 <sup>7</sup> | 3.54 <sup>*</sup> |
| 80 Trimethoprim     | 742                   |              | 852             | 2.3          |                  | 3                                   | 1.87              |
| 81 Valsartan        | 2010                  |              | 3000            | 5.4          |                  | 3                                   | 4.36              |
| 82 Verapamil        | 41                    |              | 44              |              |                  | 175 (plasma) <sup>8</sup>           |                   |
| 83 Warfarin         |                       |              | 6.2             |              |                  | 28                                  | 1.5 – 2.96        |
| N detected          | 66                    | 16           | 77              | 17           | 10               |                                     |                   |

Concentrations are quantified values from each waste water treatment plant (WWTP) effluent and water from the receiving estuary. All blank values indicate <RL (see Table S1). Bioconcentration factors (BCF) and organic carbon normalized sediment-water partition coefficients (Koc) are estimated values from the literature, unless noted. BCF for whole-body unless noted. Koc shown as log<sub>10</sub> values. All estimated BCF and Koc values from PubChem (2015). \* indicates observed values listed in PubChem (2015). See Table S1 for all analyte abbreviations. References. 1. Wang and Gardinali (2013), 2. Nakamura et al. (2008), 3. Brown et al. (2007), 4. USEPA (2005), 5. Inoue et al. (2012), 6. Arvaniti et al. (2014), 7. Orvos et al. (2002), 8. Fick et al. (2010).



| Analytes                       | Sinclair Inlet |      |        |      |       | Puyallup |      |        |      |       |      | Nisqually |        |       |      | Hatch  |
|--------------------------------|----------------|------|--------|------|-------|----------|------|--------|------|-------|------|-----------|--------|-------|------|--------|
|                                | Eff            | Est  | salmon |      | sculp | Eff      | Est  | salmon |      | sculp |      | Est       | salmon | sculp |      | salmon |
|                                |                |      | A      | B    |       |          |      | A      | B    | A     | B    |           |        | A     | B    |        |
|                                | 2014           | 2014 | 2014   | 2014 | 2014  | 2014     | 2013 | 2014   | 2014 | 2014  | 2013 | 2013      | 2014   | 2014  | 2013 | 2014   |
| ng/L                           | ng/L           | ng/g | ng/g   | ng/g | ng/L  | ng/L     | ng/g | ng/g   | ng/g | ng/g  | ng/L | ng/g      | ng/g   | ng/g  | ng/g | ng/g   |
| Miconazole                     |                |      |        |      | 4.9   |          | 1.4  | 1.8    |      |       |      |           |        |       |      |        |
| Norfluoxetine                  | 28             |      |        |      | 17    |          | 3.2  | 2.7    |      |       |      | 0.68      |        |       |      |        |
| Norverapamil                   | 13             |      | 0.20   |      | 0.20  | 14       |      | 0.47   | 0.39 |       |      | 0.12      | 0.25   |       |      |        |
| 4-NP                           | 506            |      | 30     | 33   | 27    | 1690     | 41   | 76     | 33   | 35    | 35   | 14        | 76     | 29    | 7.7  | 51     |
| NP1EO                          | 1760           |      | 3.0    | 2.2  | 3.0   | 1220     |      | 57     | 60   | 4.9   |      |           | 1.3    | 2.2   |      | 1.3    |
| NP2EO                          | 2610           |      | 1.4    | 2.2  | 1.9   | 1690     |      | 49     | 51   | 17    | 6.2  |           | 2.1    | 7.5   |      | 3.1    |
| Ormetoprim                     |                |      |        | 44   |       |          |      | 1010   | 1600 |       |      |           | 642    |       |      |        |
| PFDA                           |                |      | 0.78   |      |       |          |      |        |      |       |      |           |        |       |      |        |
| PFOS                           | 461            |      | 34     | 1.4  | 1.4   |          |      |        |      |       | 1.1  |           | 1.2    |       |      |        |
| PFOSA                          |                |      |        |      | 0.82  |          |      |        |      |       | 2.2  |           |        |       |      |        |
| Ranitidine                     |                |      |        |      | 0.97  | 494      |      | 0.82   |      |       |      | 0.75      | 1.1    |       |      |        |
| Sertraline                     | 116            |      |        |      |       | 89       |      | 17     | 4.9  | 0.21  |      |           |        |       |      |        |
| Sulfadiazine                   |                |      | 0.88   |      |       |          |      |        |      |       |      |           |        |       |      |        |
| Sulfadimethoxine               |                | 0.46 |        | 0.34 |       | 8.2      |      | 16.2   | 9.8  |       |      |           | 17     |       |      |        |
| Sulfamerazine                  |                |      |        |      |       |          |      |        | 0.51 |       |      |           |        |       |      |        |
| Triclocarban                   | 12             |      |        |      |       | 17       |      | 4.0    | 6.5  |       |      |           |        |       |      |        |
| Triclosan                      | 411            | 5.2  |        |      |       | 183      |      | 26     | 23   |       |      |           |        |       |      |        |
| Verapamil                      | 41             |      | 0.30   |      | 0.25  | 44       |      | 0.60   | 0.54 |       | 0.07 |           | 0.12   | 0.27  |      |        |
| Virginiamycin                  |                |      |        |      | 8.0   |          |      | 10     |      |       | 34   |           |        |       |      |        |
| N detected for sample          |                |      | 13     | 12   | 15    |          |      | 26     | 24   | 9     | 9    |           | 13     | 7     | 5    | 7      |
| N detected for matrix and site |                |      | 19     |      |       |          |      | 28     |      | 15    |      |           |        | 9     |      |        |

Fish and effluent (Eff) sampled in 2013 and 2014. Estuary water (Est) sampled in 2013. Hatch = Voight's Creek Hatchery (Puyallup watershed) sampled on 29 May 2014. Salmon is Chinook salmon (*Oncorhynchus tshawytscha*) and Sculp = staghorn sculpin (*Leptocottus armatus*). See Table S1 for abbreviations and reporting limits.

## Citations

- Arvaniti O.S., Andersen H.R., Thomaidis N.S., Stasinakis A.S. 2014. Sorption of perfluorinated compounds onto different types of sewage sludge and assessment of its importance during wastewater treatment. *Chemosphere* 111:405-411.
- Brown J.N., Paxeus N., Forlin L., Larsson D.G.J. 2007. Variations in bioconcentration of human pharmaceuticals from sewage effluents into fish blood plasma. *Environ Toxicol Pharm* 24:267-274.
- Chemspider. 2015. <http://www.chemspider.com> (last accessed 30 July 2015)
- Drugbank. 2015. <http://www.drugbank.ca/> (last accessed 30 July 2015)
- EWG. 2015. <http://www.ewg.org/sites/humantoxome/> (last accessed 30 July 2015)
- Fick J., Lindberg R.H., Parkkonen J., Arvidsson B., Tysklind M., Larsson D.G.J. 2010. Therapeutic levels of levonorgestrel detected in blood plasma of fish: results of screening rainbow trout exposed to sewage effluents. *Environ Sci Tech* 44:2661-2666.
- Gonzalez M.M., Camacho-Munoz, Santos JL, Aparicio I, and Alonso E. 2012. Degradation and environmental risk of surfactants after the application of compost sludge to the soil. *Waste Management* 32:1324-1331.
- Inoue Y., Hashizume N., Yakata N., Murakami H., Suzuki Y., Kikushima E., Otsuka M. 2012. Unique physiochemical properties of perfluorinated compounds and their bioconcentration in common carp *Cyprinus carpio* L. *Arch Environ Contam Toxicol* 62:672-680.
- Nakamura Y., Yamamoto H., Sekizawa J., Kondo T., Hirai N., Tatarazako N. 2008. The effects of pH on fluoxetine in Japanese medaka (*Oryzias latipes*): acute toxicity in fish larvae and bioaccumulation in juvenile fish. *Chemosphere* 70:865-873.

- Orvos D.R., Versteeg D.J., Inauen J., Capdevielle M., Rothenstein A.,  
Cunningham V. 2002. Aquatic toxicity of triclosan. *Environ Toxicol Chem*  
21:1338-1349.
- U.S. FDA. 2014. PhishPharm database. [Accessed 30 July 2015].  
<http://www.fda.gov/AnimalVeterinary/ScienceResearch/ToolsResources/Phish-Pharm/> (last accessed 30 July 2015)
- Pubchem. 2015. National Center for Biotechnology Information. PubChem  
Compound Database; <https://pubchem.ncbi.nlm.nih.gov> (last accessed 30  
July 2015)
- Toxnet. 2015. <http://toxnet.nlm.nih.gov/> (last accessed 30 July 2015)
- USEPA. 2005. Aquatic Life Ambient Water Quality – Nonylphenol. EPA-822-R-05-  
005 Office of Water. Washington, DC
- Walters E., McClellan K., Halden R.U. 2010. Occurrence and loss over three  
years of 72 pharmaceuticals and personal care products from biosolid-soil  
mixtures in outdoor mesocosms. *Water Res* 44:6011-6020.
- Wang J., Gardinali P.R. 2012. Analysis of selected pharmaceuticals in fish and  
the freshwater bodies directly affected by reclaimed water using liquid  
chromatography-tandem mass spectrometry. *Anal Bioanal Chem* 404:2711-  
2720.
- Wikipedia. 2015. <https://www.wikipedia.org/> (last accessed 30 July 2015)
- WHO. 2015. World Health Organization Model List of Essential Medicines. 19th  
List. <http://www.who.int/medicines/publications/essentialmedicines/en/> (last  
accessed 30 July 2015)
- Yuan S.Y., Yu C.H., Chang B.V. 2004. Biodegradation of nonylphenol in river  
sediment. *Environ Poll* 127:425-430.
